# Supplementary material
Source: publisher site journal article supplement (https://www.dovepress.com/article/408824)
Supplement: Supplementary file 1 [file get_supplementary_file.php]

**Supplementary Data**

**Table S1.** Primers used in this study

| Gene(s) | Primer | Product length(bp) | Annealing temperature (℃) | References |
| --- | --- | --- | --- | --- |
| *bla*KPC-full | KPC-F: 5'-tgtcactgtatcgccgtc-3' | 1010 | 58 | This study |
| KPC-R: 5'-ctcagtgctctacagaaaacc-3' |
| *bla*NDM-full | NDM-F: 5'-tcgccccatatttttgctacag-3' | 1012 | 54 | This study |
| NMD-R: 5'-cgatccttccaactcgtcgc-3' |
| *bla*IMP-1 | IMP-F1: 5'- tctcratctatccccacg | 269 | 68 | [1] |
| IMP-R1:5'- gcggactttggccaag |
| *bla*IMP-2 | IMP-F2:5'- tctcaatctattccaacatatg | 269 | 69 | [1] |
| IMP-R2: 5'- gcmgaatgtggccacg |
| *bla*VIM | VIM-F: 5'- gtttggtcgcatatcg | 155 | 66 | [1] |
| VIM-R: 5'- ccaatttgcttytcaat |
| *bla*OXA-48 | OXA-F: 5'- gctctggaatgagaataa | 125 | 66 | [1] |
| OXA-R: 5'- taaccacgcccaaa |
| *bla*TEM-full | TEM-F: 5'-ataaaattcttgaagacgaaa-3' | 1079 | 55 | This study |
| TEM-R: 5'-gacagttagcaatgcttaatca-3' |
| *bla*SHV-full | SHV-F: 5'-ccgggttattcttatttgtcgct-3' | -- | 56 | This study |
| SHV-R: 5'-tagcgttgccagtgctcg-3' |
| *bla*CTX-M-G1 | CTX-M-G1-F:5'-tttcggaagcataaaatcgg-3' | 1021 | 56 | This study |
| CTX-M-G1-R: 5'-ggcgataaacaaaaacggaa-3' |
| *bla*CTX-M-G9 | CTX-M-G9-F: 5'-aaaaatgattgaaaggtggt-3' | 1242 | 56 | This study |
| CTX-M-G9-R: 5'-gtgaagaaggtgttgctgac-3' |

**Reference**

[1] Watahiki M, Kawahara R, Suzuki M, et al. Single-Tube Multiplex Polymerase Chain Reaction for the Detection of Genes Encoding Enterobacteriaceae Carbapenemase. *Jpn J Infect Dis*. 2020;73(2):166-172.


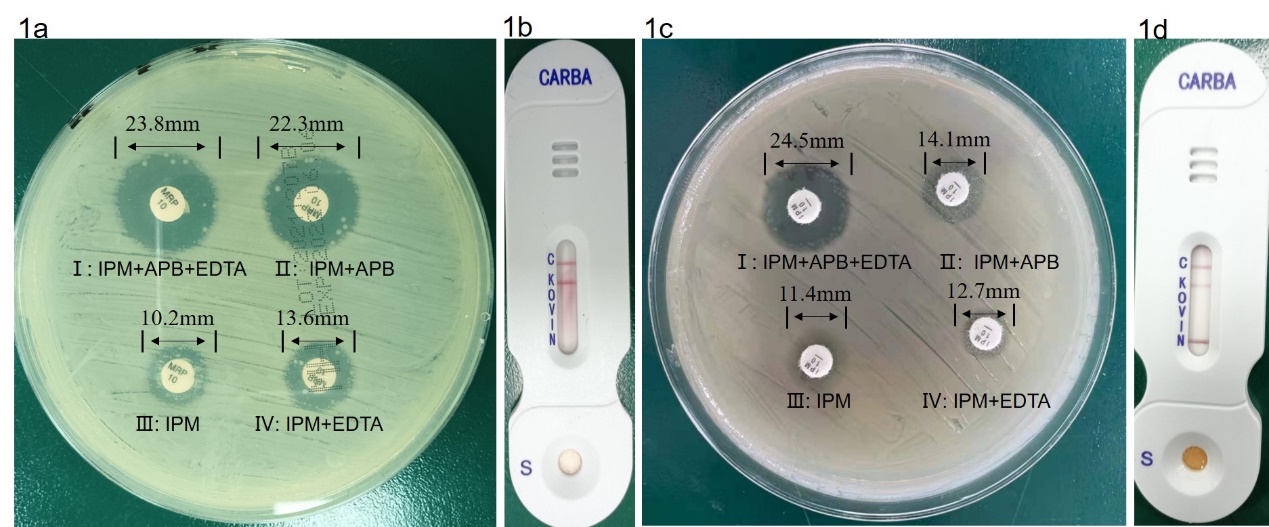


**Figure S1.** Carbapenemase phenotype and genotype tests. **1a.** A positive result of class A carbapenemases yielded by enzyme inhibitor enhancement experiment (EIE). The difference in the inhibition zone diameter between the disk Ⅲ and Ⅱ was more than 5 mm, and the difference in the inhibition zone diameter between the disk Ⅲ and Ⅳ was less than 5 mm. **1b.** A positive result of KPC carbapenemases yielded by enzyme immunochromatographic assay(EIA). **1c.** A positive result of both class A and B carbapenemases yielded by EIE. The difference in the inhibition zone diameter between the disk Ⅲ and Ⅰ was more than 5 mm. **1d.** A positive result of both KPC and NDM carbapenemases yielded by enzyme immunochromatographic assay(EIA). Abbreviations: IPM, imipenem; APB, 3-aminophenylboronic acid; EDTA, ethylenediaminetetraacetic acid; C, Control; K, KPC; O, OXA; V,VIM; I,IMP; N, NDM.


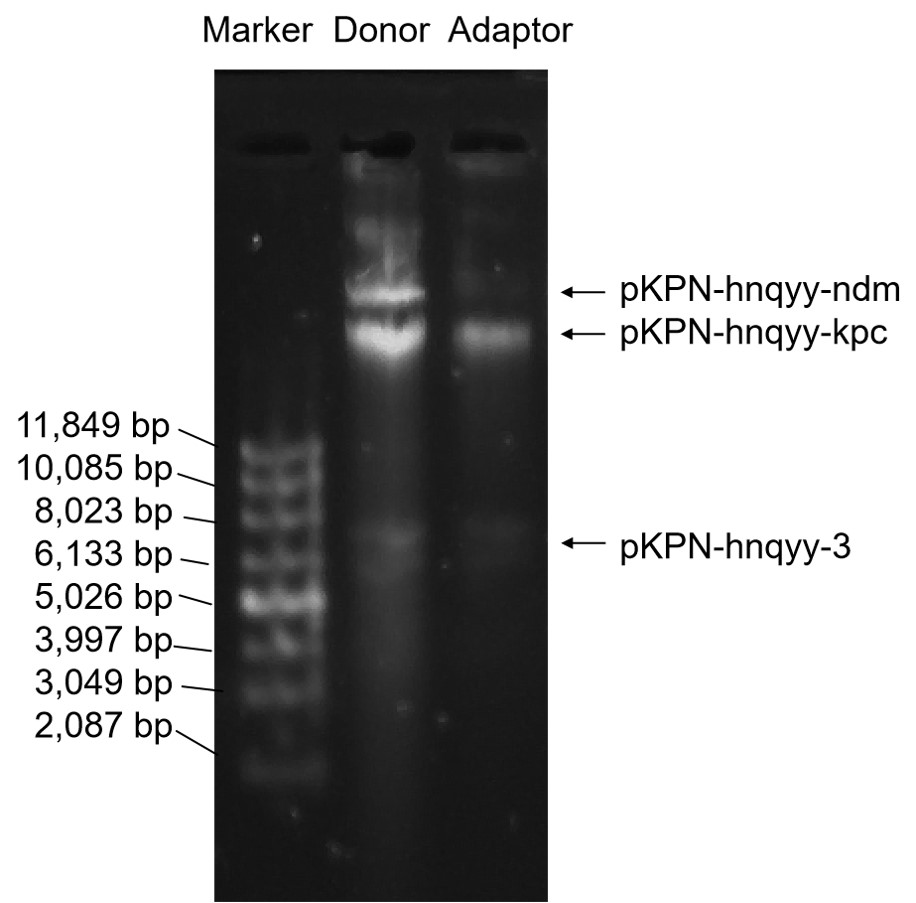


**Figure S2**. Forms of plasmid DNA by agarose gel electrophoresis. The donor strain contained three plasmids, one of which harboured *bla*KPC-2 can be successfully transferred to the adaptor strain, while the orther plasmid harboured *bla*NDM-5 can not be transferred to the adaptor strain. It is important to note that that there may be conformational differences between hyperspiral marker and plasmids, so the molecular weight of plasmids cannot be estimated by the marker.
